# Supplementary material
Source: Springer Nature journal article supplement (https://www.springermedizin.de/resource/supplementary/12936_2010_1786_MOESM5_ESM.pdf/9541708)

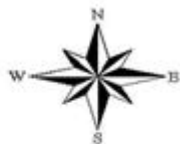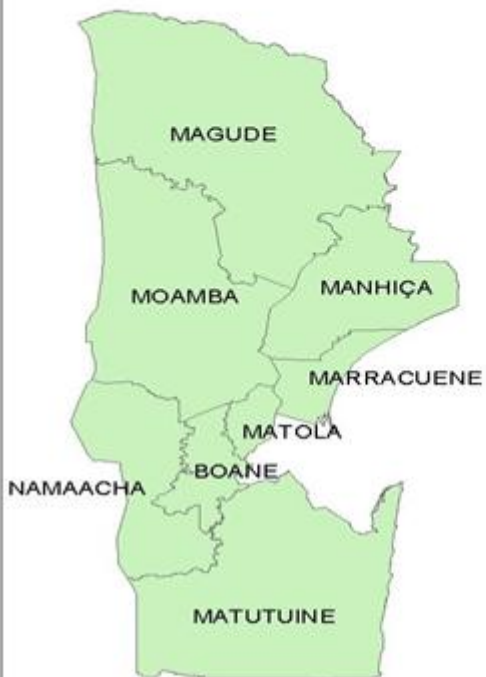

Kilometers  
1:1,500,000

Supplement: MOESM5 [file 9541708]
